# Supplementary figures and images for: Highly-crystalline γ-MnS nanosaws
Source: Royal Society of Chemistry journal article supplement (doi:10.1039/c4ra05561f), 2014-01-01

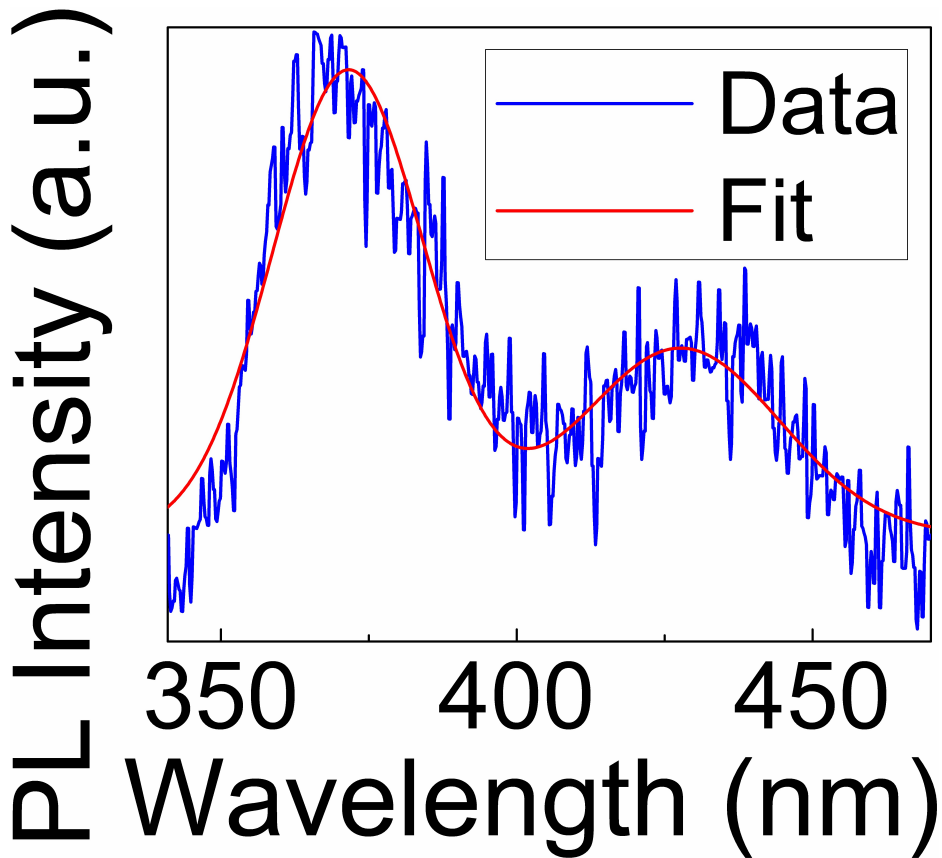

Supplement: c4ra05561f1.pdf [file c4ra05561f1.pdf]
